# Supplementary material for: A Systematic Review of the Quality of Life for Families Supporting a Child Consuming the Ketogenic Diet for Seizure Reduction
Source: PubMed Central journal article supplement — Curr Dev Nutr. 2018 Oct 22;3(5):nzz079. doi: 10.1093/cdn/nzy079 (PMC6488515; doi:10.1093/cdn/nzy079), 2018-10-22
Supplement: nzy079_supplemental_files.pdf [file nzy079_supplemental_files.pdf]

**SUPPLEMENTAL FIGURE 1** Study details of the ketogenic diet and quality of life<sup>1</sup>

| Study detail                                                                                                                                       | Study design                                       | Study objectives                                                       | Participants                                                                                                                                                                                                                                                                                                                                                               | Results                                                                                                                                                                                                                                                                                                                                                                                                                                                                                                                                                                                                                                                                                                                                                                                                                                                                                                   | Study limitations                                                                                                                                                                                                                                                                                                                                                                                       |
|----------------------------------------------------------------------------------------------------------------------------------------------------|----------------------------------------------------|------------------------------------------------------------------------|----------------------------------------------------------------------------------------------------------------------------------------------------------------------------------------------------------------------------------------------------------------------------------------------------------------------------------------------------------------------------|-----------------------------------------------------------------------------------------------------------------------------------------------------------------------------------------------------------------------------------------------------------------------------------------------------------------------------------------------------------------------------------------------------------------------------------------------------------------------------------------------------------------------------------------------------------------------------------------------------------------------------------------------------------------------------------------------------------------------------------------------------------------------------------------------------------------------------------------------------------------------------------------------------------|---------------------------------------------------------------------------------------------------------------------------------------------------------------------------------------------------------------------------------------------------------------------------------------------------------------------------------------------------------------------------------------------------------|
| 1. Bergqvist et al. (2)<br>Children’s Hospital of Philadelphia                                                                                     | Descriptive, longitudinal (15 mo)                  | KD, vitamin D status [25(OH)D and 1,25(OH)D concentrations]            | <ul style="list-style-type: none"> <li>• <i>n</i> = 45 children with IE</li> <li>• Age at enrollment: (5.1/ 2.7)<sup>a</sup>y</li> <li>• 12 girls</li> <li>• 33 boys</li> <li>• Low 25(OH)D due to AEDs</li> </ul>                                                                                                                                                         | <ul style="list-style-type: none"> <li>• KD for 3 mo increased 25(OH)D by 8 ng/mL, <i>P</i> &lt; 0.001</li> <li>• KD for 3–15 mo: 25(OH)D declined by ~0.5 ng/mL (<i>P</i> = 0.003)</li> <li>• Baseline: parathyroid hormone concentrations positively associated with age and number of AEDs; no significance for 1,25(OH)D</li> <li>• Vitamin D supplementation improves vitamin D status over first 3 mo</li> <li>• Suboptimal growth and sedentary or low active life correlated with energy requirement</li> </ul>                                                                                                                                                                                                                                                                                                                                                                                   | <ul style="list-style-type: none"> <li>• Diet adherence not mentioned, dropout rate and reasons not discussed</li> <li>• QoL associated with low growth, low activity, and overall EER not discussed</li> </ul>                                                                                                                                                                                         |
| 2. Bergqvist et al. (26)<br>Children’s Hospital of Philadelphia, PA                                                                                | Comparison study (15 mo)                           | KD and bone health in children with IE, compared with healthy children | <ul style="list-style-type: none"> <li>• <i>n</i> = 48 started at enrollment, subsample <i>n</i> = 25 used for results</li> <li>• <i>n</i> = 847 control group</li> <li>• Age at enrollment: (7.3/1.9)<sup>a</sup> y</li> <li>• 16 girls</li> <li>• 9 boys</li> </ul>                                                                                                      | <ul style="list-style-type: none"> <li>• BMC significantly reduced in the whole body and spine and after correction for both age and height, <i>P</i> &lt; 0.001, and with prescribed vitamin D and Ca supplements</li> <li>• Serum vitamin D suboptimal in patients on KD</li> <li>• BMC negatively correlated with younger age at start of KD and with low BMI, nonambulatory</li> </ul>                                                                                                                                                                                                                                                                                                                                                                                                                                                                                                                | <ul style="list-style-type: none"> <li>• Diet adherence not mentioned</li> <li>• We calculated 48% dropout rate</li> <li>• Reasons for dropout not discussed</li> <li>• Weight bearing and physical activity not controlled for but positively associated with BC</li> </ul>                                                                                                                            |
| 3. Carabello et al. (20)<br>Garrahan Hospital and Italian Hospital in Buenos Aires, and Centro de Neurociencias del Litoral in Santa Fe, Argentina | Retrospective study with multicenter collaboration | Efficacy and tolerability of KD for different epilepsy syndromes       | <ul style="list-style-type: none"> <li>• <i>n</i> = 216 with IE despite 2–3 AEDs</li> <li>• Age at KD implementation: (1–18)<sup>b</sup> y</li> <li>• Excluded: liver, kidney, heart, gastrointestinal, psychiatric diseases, and progressive encephalopathy with/without metabolic markers, except those metabolic diseases in which KD is used as a treatment</li> </ul> | <ul style="list-style-type: none"> <li>• 140 (65%) remained on the KD through the full the study</li> <li>• 29 (20.5%) became seizure-free, and 50 (36%) had 75–99% decrease in seizures. 56% had seizure control of &gt;75%</li> <li>• Of the 29 seizure-free patients, 20 discontinued the KD, but seizures recurred</li> <li>• KD should be considered early in myoclonic astatic seizures, Dravet syndrome, cryptogenic Lennox–Gastaut, and West syndrome</li> <li>• KD discontinued due to: <ul style="list-style-type: none"> <li>• seizure freedom for &gt;2 y (14%)</li> <li>• seizure reduction of &gt;50% for &gt;2 y (28%)</li> <li>• severe toxicities (5%)</li> <li>• inability to adhere to diet (10%)</li> <li>• lack of efficacy (8%)</li> <li>• patient or family request (8%)</li> </ul> </li> <li>• 5 patients died from pneumonia (2), sepsis, status epilepticus, unknown</li> </ul> | <ul style="list-style-type: none"> <li>• Comorbidities not controlled for</li> <li>• Death of 5 patients indicates variable health status at entry</li> <li>• No QoL measures or factors</li> <li>• Families requested exit and inability to adhere to diet indicates burden</li> <li>• Retrospective design</li> <li>• Length of time required to be classified as seizure-free not defined</li> </ul> |

(Continued)

**SUPPLEMENTAL FIGURE 1 (Continued)**

| Study detail                                                                                                               | Study design                                         | Study objectives                                                                                                                                                                     | Participants                                                                                                                                                                                                                                                                                                                                                                                                                                                                                                                                               | Results                                                                                                                                                                                                                                                                                                                                                                                                                                                                                                                                                                                                                                                                       | Study limitations                                                                                                                                                                                                                            |
|----------------------------------------------------------------------------------------------------------------------------|------------------------------------------------------|--------------------------------------------------------------------------------------------------------------------------------------------------------------------------------------|------------------------------------------------------------------------------------------------------------------------------------------------------------------------------------------------------------------------------------------------------------------------------------------------------------------------------------------------------------------------------------------------------------------------------------------------------------------------------------------------------------------------------------------------------------|-------------------------------------------------------------------------------------------------------------------------------------------------------------------------------------------------------------------------------------------------------------------------------------------------------------------------------------------------------------------------------------------------------------------------------------------------------------------------------------------------------------------------------------------------------------------------------------------------------------------------------------------------------------------------------|----------------------------------------------------------------------------------------------------------------------------------------------------------------------------------------------------------------------------------------------|
| 4. Christodoulides et al. (22)<br>London, UK                                                                               | Two-group RCT and pairwise comparisons with baseline | Assess risk of micronutrient deficiency in children treated with classical or MCT KD by measuring plasma vitamin A and E, Zn, Se, and Mg concentrations at baseline, 3, 6, and 12 mo | <ul style="list-style-type: none"> <li>• <math>n = 145</math> enrolled into RCT with results from <math>n = 91</math> [classical: <math>n = 46</math> (21 female; 25 male); MCT: <math>n = 45</math> (21 female; 24 male)]</li> <li>• Orally fed (classical: <math>n = 37</math>; MCT: <math>n = 41</math>)</li> <li>• Gastrostomy fed (classical: <math>n = 5</math>; MCT: <math>n = 3</math>)</li> <li>• Oral and gastrostomy fed (classical: <math>n = 4</math>; MCT: <math>n = 1</math>)</li> <li>• Age at enrollment: (2–16)<sup>b</sup> y</li> </ul> | <ul style="list-style-type: none"> <li>• Classical KD group (baseline to 12 mo)—vitamin A: 1.41 to 1.13 <math>\mu\text{mol/L}</math>, <math>P &lt; 0.001</math>; vitamin E: 22.7 to 33.2 <math>\mu\text{mol/L}</math>, <math>P &lt; 0.001</math></li> <li>• MCT (baseline to 12 mo) vitamin A: 1.52 to 1.81 <math>\mu\text{mol/L}</math>, <math>P &lt; 0.001</math>; vitamin E: 22.3 to 23.3 <math>\mu\text{mol/L}</math>, <math>P &lt; 0.05</math></li> <li>• Both (baseline to 12 mo) Se: 0.95 to 0.88 <math>\mu\text{mol/L}</math>, <math>P &lt; 0.05</math>; Mg: 0.87 to 0.83 <math>\mu\text{mol/L}</math>, <math>P &lt; 0.001</math></li> <li>• Zn: no change</li> </ul> | <ul style="list-style-type: none"> <li>• We calculated 37% dropout rate</li> <li>• Reasons for dropout not discussed</li> <li>• Micronutrient interaction not measured</li> <li>• Selenium not measured</li> </ul>                           |
| 5. Coppola et al. (27)<br>Epilepsy Unit of the Clinic of Child Neuropsychiatry, Second University of Naples, Naples, Italy | Comparison observational study                       | KD and endothelial function, arterial morphology, and cardiac diastolic function in children with IE                                                                                 | <ul style="list-style-type: none"> <li>• <math>n = 23</math>, control <math>n = 20</math></li> <li>• Age at enrollment: (11/8)<sup>a</sup>y</li> <li>• 12 girls</li> <li>• 11 boys</li> <li>• 3 excluded because they did not attend all examinations</li> </ul>                                                                                                                                                                                                                                                                                           | <ul style="list-style-type: none"> <li>• Patients had significantly higher Alx, <math>\beta</math>-index, and blood cholesterol concentrations vs. controls, <math>P &lt; 0.001</math></li> <li>• No increased carotid intima thickness vs. controls (NS)</li> <li>• Age, gender, AEDs, BMI, plasma glucose, and serum creatinine did not affect arterial stiffness</li> <li>• <math>\beta</math>-Stiffness and total blood cholesterol correlated (<math>P &lt; 0.05</math>)</li> <li>• Alx values and serum triglycerides, <math>P &lt; 0.001</math></li> </ul>                                                                                                             | <ul style="list-style-type: none"> <li>• Side effects of KD and patient/family tolerance not discussed</li> <li>• Dropout rate not documented</li> <li>• Neither QoL nor factors measured</li> </ul>                                         |
| 6. Dressler et al. (21)<br>Austria                                                                                         | Qualitative, retrospective case series               | Evaluating long-term efficacy/tolerability of KD in IE                                                                                                                               | <ul style="list-style-type: none"> <li>• <math>n = 52</math></li> <li>• Age at enrollment: (4.5/3.55)<sup>a</sup>y</li> <li>• 28 girls</li> <li>• 22 boys</li> </ul>                                                                                                                                                                                                                                                                                                                                                                                       | <ul style="list-style-type: none"> <li>• <math>n = 52</math>; 2 dropped out after 6 d of KD by refusing meals,</li> <li>• 50% of patients responded to KD: EEG background activity improved (<math>P = 0.014</math>) and there was a lower rate of epileptic discharges (<math>P = 0.009</math>)</li> <li>• 28% had side effects</li> <li>• KD effective if initiated early</li> <li>• Effective with multiple seizure types, and generalized tonic clonic seizures</li> <li>• Favorable treatment outcome associated with shorter disease duration (<math>P = 0.025</math>) and GTC seizures (<math>P = 0.059</math>)</li> </ul>                                             | <ul style="list-style-type: none"> <li>• Patients left study refusing meals, which shows the difficulty of KD prescribed diet</li> <li>• Retrospective design</li> <li>• Length of time to be considered seizure-free not defined</li> </ul> |

(Continued)

**SUPPLEMENTAL FIGURE 1 (Continued)**

| Study detail                                                     | Study design                                                                                                       | Study objectives                                                                                                                                                                                                                                          | Participants                                                                                                                                                                   | Results                                                                                                                                                                                                                                                                                                                                                                                                                                                                                                                                                                                                                                 | Study limitations                                                                                                                                                                                                                                                                          |
|------------------------------------------------------------------|--------------------------------------------------------------------------------------------------------------------|-----------------------------------------------------------------------------------------------------------------------------------------------------------------------------------------------------------------------------------------------------------|--------------------------------------------------------------------------------------------------------------------------------------------------------------------------------|-----------------------------------------------------------------------------------------------------------------------------------------------------------------------------------------------------------------------------------------------------------------------------------------------------------------------------------------------------------------------------------------------------------------------------------------------------------------------------------------------------------------------------------------------------------------------------------------------------------------------------------------|--------------------------------------------------------------------------------------------------------------------------------------------------------------------------------------------------------------------------------------------------------------------------------------------|
| 7. Hallböök et al. (33).<br>Sweden                               | Quantitative observational study, longitudinal (12 mo)                                                             | Sleep patterns in correlation to KD, seizure severity and frequency, QoL, attention, and behavior; in children, IE, QoL was measured with a visual analog scale, parent's feedback of child behavior and attention assessed with child behavior checklist | <ul style="list-style-type: none"> <li>• <math>n = 18</math></li> <li>• Age at KD implementation: (7.5/2-15)<sup>c</sup> y</li> <li>• 9 girls</li> <li>• 9 boys</li> </ul>     | <ul style="list-style-type: none"> <li>• 18 participants examined at 1 and 3 mo</li> <li>• 11 participants (61%) left at 12 mo</li> <li>• KD induced a decrease in total sleep (<math>P = 0.05</math>) and total night sleep (<math>P = 0.006</math>); REM sleep increased (<math>P = 0.01</math>)</li> <li>• Seizure frequency reduction at 3 mo (<math>P = 0.001</math>) and 12 mo (<math>P = 0.003</math>)</li> <li>• QoL improved after 3 and 12 mo (<math>P &lt; 0.001</math>, <math>P = 0.005</math>), and increased REM sleep was correlated with improved QoL (Spearman <math>r = 0.6</math>, <math>P = 0.01</math>)</li> </ul> | <ul style="list-style-type: none"> <li>• Sleep is variably affected by epilepsy and seizures; wide variations before KD</li> <li>• Confounder sleep is protective and triggers seizure</li> <li>• Lack of generalizability</li> <li>• Parental reports may have subjective bias</li> </ul> |
| 8. Hawkes et al. (23)<br>Children's Hospital of Philadelphia, PA | Case series, retrospective chart review                                                                            | Describe 3 children who developed hypercalcemia while on KD                                                                                                                                                                                               | <ul style="list-style-type: none"> <li>• <math>n = 3</math></li> <li>• Age at enrollment: (2.5–5.5)<sup>b</sup> y</li> <li>• Patients on KD for 6–12 mo</li> </ul>             | <ul style="list-style-type: none"> <li>• Suggests an association between KD and hypercalcemia</li> <li>• KD may impair osteoblast activity, prevent reuptake of Ca</li> <li>• Each patient had elevated Ca concentrations, normal phosphate, moderately elevated urinary Ca excretion, and low alkaline phosphatase, parathyroid hormone, and 1,25(OH)D</li> </ul>                                                                                                                                                                                                                                                                      | <ul style="list-style-type: none"> <li>• Diet adherence not mentioned, dropout rate and reasons not discussed</li> <li>• Only 3 subjects on variable time period</li> <li>• Limited generalizability</li> <li>• Retrospective chart review may have missing data</li> </ul>                |
| 9. Kim et al. (30)<br>Yonsei Medical Center in Seoul, Korea      | Retrospective chart review comparing z scores for height, weight, and BMI at baseline, 2 y of KD, and 1 y after KD | Assess growth delay in children; verify catch-up growth 1y after KD; define association between growth and patient characteristics, i.e., ambulatory status, seizure outcome, and age of KD start                                                         | <ul style="list-style-type: none"> <li>• <math>n = 40</math></li> <li>• Age at KD implementation: (0.58–15.52)<sup>b</sup> y</li> <li>• 20 girls</li> <li>• 20 boys</li> </ul> | <ul style="list-style-type: none"> <li>• Compared with baseline: height significantly reduced (<math>P = 0.000</math>) with 2 y of KD; no difference 1 y after weaning (<math>P = 0.569</math>); significant weight drop at 2 y of KD (<math>P = 0.004</math>); no difference 1 y after weaning (<math>P = 0.060</math>)</li> <li>• Significant catch-up growth 1 y after KD</li> <li>• Catch-up growth positively associated w/ambulation; negatively associated w/early age of KD start and IE</li> </ul>                                                                                                                             | <ul style="list-style-type: none"> <li>• Retrospective design; missing data</li> <li>• Diet adherence not mentioned</li> <li>• Dropout rate and reasons not discussed</li> </ul>                                                                                                           |

(Continued)

## SUPPLEMENTAL FIGURE 1 (Continued)

| Study detail                                                    | Study design                                                                                                                                          | Study objectives                                                                | Participants                                                                                                                                                                                                          | Results                                                                                                                                                                                                                                                                                                                                                                                                                                                                                                                                                                                                                                                          | Study limitations                                                                                                                                                                                                                                                                                                                  |
|-----------------------------------------------------------------|-------------------------------------------------------------------------------------------------------------------------------------------------------|---------------------------------------------------------------------------------|-----------------------------------------------------------------------------------------------------------------------------------------------------------------------------------------------------------------------|------------------------------------------------------------------------------------------------------------------------------------------------------------------------------------------------------------------------------------------------------------------------------------------------------------------------------------------------------------------------------------------------------------------------------------------------------------------------------------------------------------------------------------------------------------------------------------------------------------------------------------------------------------------|------------------------------------------------------------------------------------------------------------------------------------------------------------------------------------------------------------------------------------------------------------------------------------------------------------------------------------|
| 10. Kossoff et al. (11)<br>The Johns<br>Hopkins Hospital,<br>MD | Single case report                                                                                                                                    | Patient with tuberous<br>sclerosis complex and<br>epilepsy on KD for 21 y       | <ul style="list-style-type: none"> <li>• <math>n = 1</math> (male)</li> <li>• Followed from 6y<sub>oa</sub>–26y<sub>oa</sub></li> <li>• Subject began 3:1 KD at 6 y of age, switching to 4:1 KD after 1 mo</li> </ul> | <ul style="list-style-type: none"> <li>• Current meals now range from 2:1 to 4.6:1 with consistent annual urine ketones at 160 mg/dL</li> <li>• Longest known duration of individual continuous adherence to KD at time of publication</li> <li>• Seizures have been reduced to once annually</li> <li>• Minimal adverse effects: no reported kidney stones, constipation, acidosis, fatigue, or bone fractures</li> <li>• Adverse effects: shorter height, mild hypocholesteremia, hypocarnitinemia (asymptomatic)</li> </ul>                                                                                                                                   | <ul style="list-style-type: none"> <li>• Limited generalizability</li> <li>• No cause-effect relation</li> <li>• Danger of overinterpretation</li> <li>• Publication bias</li> <li>• Retrospective design</li> <li>• Longest duration of KD not attributed to anything; lack of understanding why adherence for so long</li> </ul> |
| 11. Lambrechts et al. (32)<br>Netherlands                       | Comparison study (6 mo),<br>quantitative<br>through use of<br>parent report<br>questionnaires<br>and cognitive-<br>oriented<br>psychological<br>tests | Effects of KD on cognition, mood, and social<br>behavior in children with<br>IE | <ul style="list-style-type: none"> <li>• <math>n = 15</math></li> <li>• Age at KD implementation: (12/3.6)<sup>a</sup>y</li> </ul>                                                                                    | <ul style="list-style-type: none"> <li>• No results on a statistically significant level</li> <li>• Dropout rate 27% (<math>n = 4</math>) due to low treatment efficacy for seizure control (<math>n = 3</math>) and increased seizure frequency with behavior issues (<math>n = 1</math>)</li> <li>• 33% (<math>n = 5</math>) had &gt;50% seizure reduction</li> <li>• 40% (<math>n = 6</math>) remained on the KD with &lt;50% seizure reduction but had improved alertness and seizure control</li> <li>• Cognition levels showed a small trend of improvement, with a slight decrease in psychosocial adjustment and an increase in mood problems</li> </ul> | <ul style="list-style-type: none"> <li>• Parental reports of seizures may have subjective bias, may miss absent seizures</li> <li>• Small sample size</li> <li>• No control group, pre-/posttest used</li> </ul>                                                                                                                   |

(Continued)

**SUPPLEMENTAL FIGURE 1 (Continued)**

| Study detail                         | Study design                                                      | Study objectives                                                                                                                                                                                                          | Participants                                                                                                                                                                                                                                                                                                                             | Results                                                                                                                                                                                                                                                                                                                                                                                                                                                                                                                                                                                                                                                                                                                                                                                                                                                                                                                                                                                                                                                                                                                                                                                                                                                                                         | Study limitations                                                                                                                                                                                                                                                                                                                                                                                                             |
|--------------------------------------|-------------------------------------------------------------------|---------------------------------------------------------------------------------------------------------------------------------------------------------------------------------------------------------------------------|------------------------------------------------------------------------------------------------------------------------------------------------------------------------------------------------------------------------------------------------------------------------------------------------------------------------------------------|-------------------------------------------------------------------------------------------------------------------------------------------------------------------------------------------------------------------------------------------------------------------------------------------------------------------------------------------------------------------------------------------------------------------------------------------------------------------------------------------------------------------------------------------------------------------------------------------------------------------------------------------------------------------------------------------------------------------------------------------------------------------------------------------------------------------------------------------------------------------------------------------------------------------------------------------------------------------------------------------------------------------------------------------------------------------------------------------------------------------------------------------------------------------------------------------------------------------------------------------------------------------------------------------------|-------------------------------------------------------------------------------------------------------------------------------------------------------------------------------------------------------------------------------------------------------------------------------------------------------------------------------------------------------------------------------------------------------------------------------|
| 12. McNamara et al. (29)<br>Michigan | Qualitative questionnaires based on chart review within past 10 y | <ul style="list-style-type: none"> <li>To assess medical and psychosocial factors of “successful” KD treatment</li> <li>Successful treatment = discontinuation of KD once seizure-free or clinically indicated</li> </ul> | <ul style="list-style-type: none"> <li>n = 82 parent questionnaires sent</li> <li>Age at epilepsy diagnosis: (0–4.7)<sup>b</sup>y</li> </ul>                                                                                                                                                                                             | <ul style="list-style-type: none"> <li>(30%) 25 returned questionnaires with 2 incomplete</li> <li>14 of 23 patients considered successful treated with KD</li> <li>Lower seizure frequency before KD initiation (<math>P = 0.02</math>) and post-diet seizure improvement (<math>P = 0.01</math>) associated with increased odds of success</li> <li>Family reported challenges: time to prepare food (<math>n = 11</math>), diet too restrictive (<math>n = 9</math>), no support network (<math>n = 7</math>); having someone to call such as a family with KD experience would be helpful</li> <li>Information parents wished they knew before starting KD: how much the KD affected family (<math>n = 9</math>), side effects (<math>n = 8</math>), supplies needed for KD (<math>n = 6</math>), time to prepare meals (<math>n = 6</math>)</li> <li>52% (<math>n = 12</math>) became seizure-free or had frequency reduction <math>\geq 95\%</math> with the KD, 26% (<math>n = 6</math>) observed no change to seizure control, 22% (<math>n = 5</math>) saw seizure reduction <math>\leq 50\%</math></li> <li>Reasons for KD discontinuation: seizure freedom (<math>n = 4</math>), no improvement with treatment (<math>n = 5</math>), adverse effects (<math>n = 3</math>)</li> </ul> | <p>Low response rate unexplained:</p> <ul style="list-style-type: none"> <li>Parent response to questionnaires may have subjective bias, may miss some seizures</li> <li>Length of time to seizure freedom not defined</li> <li>Most participants were Caucasian and on Medicaid</li> <li>Surveys returned primarily by mothers, fathers may have had different perspective</li> </ul>                                        |
| 13. Raju et al. (25)<br>India        | Quantitative, randomized comparison (3 mo)                        | Compare efficiency and feasibility of a 2.5 g:1 g (fat:carbohydrate/protein) vs classic 4:1 KD                                                                                                                            | <ul style="list-style-type: none"> <li>n = 38 with <math>\geq 2</math> seizures/mo despite adherence to <math>&gt; 2</math> AEDs</li> <li>Age at enrollment: (0.5–5)<sup>b</sup>y</li> <li>Randomly enrolled in 2 groups (<math>n = 19</math>/group): 4:1 diet (female = 3, male = 16) and 2.5:1 diet (female = 4, male = 15)</li> </ul> | <ul style="list-style-type: none"> <li>16% (<math>n = 6</math> or 3 from each group) discontinued the KD before conclusion of study due to: unsatisfactory seizure control, nonacceptance by family, and child’s refusal to eat</li> <li>n=2 from 4:1 group and n=1 from 2.5:1 group were hospitalized for respiratory tract infections and KD was discontinued</li> <li>At 3 mo, 58% (<math>n = 11</math>) of the 4:1 group and 63% (<math>n = 12</math>) of the 2.5:1 group had <math>&gt; 50\%</math> seizure reduction (<math>P = 0.78</math>); 26% (<math>n = 5</math>) of the 4:1 group and 21% (<math>n = 4</math>) in the 2.5:1 group were seizure-free</li> <li>2.5:1 group displayed a trend (<math>P = 0.06</math>) toward higher cholesterol and HDL at 3 mo</li> </ul>                                                                                                                                                                                                                                                                                                                                                                                                                                                                                                             | <ul style="list-style-type: none"> <li>Seizure frequency monitored with parent records of seizure-free, <math>&gt; 50\%</math> seizure reduction and <math>&lt; 50\%</math> seizure reduction</li> <li>Length of time to reach seizure freedom not defined and subject to parental interpretation</li> <li>Small sample size and parent records risk of subjective error and missing myoclonic and absent seizures</li> </ul> |

(Continued)

SUPPLEMENTAL FIGURE 1 (Continued)

| Study detail                                                   | Study design                                 | Study objectives                                                                             | Participants                                                                                                                                                                                                                                                                                            | Results                                                                                                                                                                                                                                                                                                                                                                                                                                                                                                                                                                                                                                                                                                                                                                                                                                                                                                                                                                                                                                                                                                                                                                                                    | Study limitations                                                                                                                                                                                                                                                                                                                                                                                                                                                                                                                                                                                                                                                                                                                                                                                               |
|----------------------------------------------------------------|----------------------------------------------|----------------------------------------------------------------------------------------------|---------------------------------------------------------------------------------------------------------------------------------------------------------------------------------------------------------------------------------------------------------------------------------------------------------|------------------------------------------------------------------------------------------------------------------------------------------------------------------------------------------------------------------------------------------------------------------------------------------------------------------------------------------------------------------------------------------------------------------------------------------------------------------------------------------------------------------------------------------------------------------------------------------------------------------------------------------------------------------------------------------------------------------------------------------------------------------------------------------------------------------------------------------------------------------------------------------------------------------------------------------------------------------------------------------------------------------------------------------------------------------------------------------------------------------------------------------------------------------------------------------------------------|-----------------------------------------------------------------------------------------------------------------------------------------------------------------------------------------------------------------------------------------------------------------------------------------------------------------------------------------------------------------------------------------------------------------------------------------------------------------------------------------------------------------------------------------------------------------------------------------------------------------------------------------------------------------------------------------------------------------------------------------------------------------------------------------------------------------|
| 14. Selter et al. (12)<br>The Johns<br>Hopkins Hospital,<br>MD | Retrospective<br>chart review<br>(5 y, 8 mo) | Dietary and<br>medication<br>adjustments for<br>improved seizure<br>control on KD<br>therapy | <ul style="list-style-type: none"> <li>• <math>n = 200</math> beginning 3:1 KD for seizure control October 2007 to June 2013</li> <li>• Mean age at KD implementation: <math>(4.3)^d</math> y</li> <li>• 99 girls</li> <li>• 101 boys</li> <li>• Consuming the KD for 0.1–4.5 y (mean 1.1 y)</li> </ul> | <ul style="list-style-type: none"> <li>• No difference across dietary changes in seizure control (<math>P = 0.58</math>)</li> <li>• Patients with <math>&gt;1\%</math> further seizure reduction with dietary changes started KD younger (3.6 vs. 5.1 y, <math>P = 0.2</math>) and had earlier age of seizure onset (1.2 vs. 2 y, <math>P = 0.049</math>)</li> <li>• 27% (<math>n = 12</math>) no interventions, immediately became seizure-free with KD</li> <li>• 78% (<math>n = 156</math>) had <math>\geq 1</math> intervention during KD</li> <li>• 24% of medication changes led to <math>&gt;50\%</math> further seizure reduction vs. 15% of diet changes (<math>P = 0.08</math>)</li> <li>• 62% (<math>n = 124</math>) had <math>\geq 50\%</math> improvement in seizure control on the KD, 29% (<math>n = 58</math>) saw periods of prolonged seizure freedom</li> <li>• Individualizing KD therapy can improve its therapeutic effects; 1/5 patients experienced added benefit from interventions</li> <li>• Fewer medication changes than dietary changes occurred</li> <li>• Provide counseling to parents, reassure that medication added with KD does not mean KD is ineffective</li> </ul> | <ul style="list-style-type: none"> <li>• Diet adherence not mentioned, dropout rate and reasons not discussed</li> <li>• No definition of seizure freedom, length of time to be considered seizure-free not discussed</li> <li>• Seizure calendars completed by parent reports have risk of subjective bias and may miss some seizures</li> <li>• Retrospective study, no control group with no interventions</li> <li>• Multiple interventions occurring simultaneously with diet and medication changes, difficult to determine which adjustment responsible change in seizure frequency</li> <li>• Interventions were primarily modifications of diet to address adverse effects of diet, e.g., calorie intake increase or adding a supplement</li> <li>• Implication parents were confused by KD</li> </ul> |

(Continued)

**SUPPLEMENTAL FIGURE 1 (Continued)**

| Study detail                                | Study design                                            | Study objectives                                                                                                             | Participants                                                                                                                                                                                                                                                                                                                             | Results                                                                                                                                                                                                                                                                                                                                                                                                                                                                                                                                                                                                                                                                                                                                                                        | Study limitations                                                                                                                                                                                                                                                                                       |
|---------------------------------------------|---------------------------------------------------------|------------------------------------------------------------------------------------------------------------------------------|------------------------------------------------------------------------------------------------------------------------------------------------------------------------------------------------------------------------------------------------------------------------------------------------------------------------------------------|--------------------------------------------------------------------------------------------------------------------------------------------------------------------------------------------------------------------------------------------------------------------------------------------------------------------------------------------------------------------------------------------------------------------------------------------------------------------------------------------------------------------------------------------------------------------------------------------------------------------------------------------------------------------------------------------------------------------------------------------------------------------------------|---------------------------------------------------------------------------------------------------------------------------------------------------------------------------------------------------------------------------------------------------------------------------------------------------------|
| 15. Sharma et al. (28)<br>India             | Qualitative prospective, open label, uncontrolled study | Evaluate tolerability and efficacy of KD in young Indian children with IE and assess change in biochemical and lipid profile | <ul style="list-style-type: none"> <li>• <math>n = 41</math> eligible having <math>1 \geq</math> seizure/d or 7 seizures/wk despite <math>\geq 3</math> AEDs</li> <li>• Age at enrollment: (2.5/0.75-5)<sup>c</sup> y</li> <li>• Excluded: systemic illness, surgically remedial causes, and metabolic related illnesses</li> </ul>      | <ul style="list-style-type: none"> <li>• 88% on KD at 3 mo; 55% on KD at 6 mo; 37% on KD at 1 y</li> <li>• 48% had &gt;50% reduction in seizures; 18.5% seizure-free</li> <li>• 34% (<math>n = 14</math>) families eligible but refused their child to receive the KD: restricting diet, financial reasons, apprehension, transportation issues, time-consuming to maintain KD</li> <li>• During the 12 mo study, 41% (<math>n = 17</math>) discontinued the KD: 2 subjects refused to eat, 3 developed serious infections, 11 unsatisfactory seizure control, 1 from parental fatigue</li> <li>• No significant biochemical change, except decreased serum albumin (<math>P = 0.0453</math>) and increased urine calcium-creatinine ratio (<math>P = 0.035</math>)</li> </ul> | <ul style="list-style-type: none"> <li>• Seizure freedom limitations not defined. Length of time to be considered seizure-free not discussed</li> <li>• Seizure reports by parents, may have subjective bias and miss absent seizures</li> <li>• Generalizability limited to Indian children</li> </ul> |
| 16. Sirikonda et al. (24)<br>Morgantown, WV | Single case report                                      | KD patient developing acute cardiovascular issues secondary to Se deficiency post-elective surgery                           | <ul style="list-style-type: none"> <li>• <math>n = 1</math> (male)</li> <li>• Mean age at study: 5 y</li> <li>• Subject with IE on KD for 2.5 mo</li> <li>• Subject's additional comorbidities: developmental delay, psychomotor retardation, tracheostomy with night-time ventilator dependence, gastrostomy tube, scoliosis</li> </ul> | <ul style="list-style-type: none"> <li>• Patient became tachycardic and hypotensive postspinal surgery (Day 1)</li> <li>• KD ceased for 10 d with Se supplemented to treat Se deficiency-induced cardiomyopathy</li> <li>• Empiric supplementation started; patients' serum Se was <math>&lt;25 \mu\text{g/L}</math> (baseline serum Se before KD, <math>104 \mu\text{g/L}</math>)</li> <li>• Cardiac function normalized but unable to return to prior neurologic function, compassionate withdrawal of support chosen by parents</li> <li>• ECG, echocardiogram, and selenium levels should be determined preoperatively for those on KD</li> </ul>                                                                                                                          | <ul style="list-style-type: none"> <li>• Parental reports of seizures may have subjective bias, may miss absent seizures</li> <li>• Limited generalizability</li> <li>• No control group, pre-/posttest used</li> </ul>                                                                                 |

(Continued)

## SUPPLEMENTAL FIGURE 1 (Continued)

| Study detail                                                                                                     | Study design                                                                                                                            | Study objectives                                                                         | Participants                                                                                                                                                                                                                                                                                                                                                                                                                                                                    | Results                                                                                                                                                                                                                                                                                                                                                                                                                                                                                                                                                                                                                                                                                                                                                                                                                                                           | Study limitations                                                                                                                                                                                                                                                           |
|------------------------------------------------------------------------------------------------------------------|-----------------------------------------------------------------------------------------------------------------------------------------|------------------------------------------------------------------------------------------|---------------------------------------------------------------------------------------------------------------------------------------------------------------------------------------------------------------------------------------------------------------------------------------------------------------------------------------------------------------------------------------------------------------------------------------------------------------------------------|-------------------------------------------------------------------------------------------------------------------------------------------------------------------------------------------------------------------------------------------------------------------------------------------------------------------------------------------------------------------------------------------------------------------------------------------------------------------------------------------------------------------------------------------------------------------------------------------------------------------------------------------------------------------------------------------------------------------------------------------------------------------------------------------------------------------------------------------------------------------|-----------------------------------------------------------------------------------------------------------------------------------------------------------------------------------------------------------------------------------------------------------------------------|
| 17. Tagliabue et al. (31)<br>Department of Child Neuropsychiatry IRCCS Casimiro Mondino Foundation, Pavia, Italy | Prospective, single-arm observational study (6 mo)                                                                                      | Nutritional status, REE, and substrate oxidation rates pre- and post-6 mo of KD          | <ul style="list-style-type: none"> <li><math>n = 18</math> with IE</li> <li>Age at enrollment: (12.4/5.6)<sup>a</sup>y</li> <li>10 girls</li> <li>8 boys</li> </ul>                                                                                                                                                                                                                                                                                                             | <ul style="list-style-type: none"> <li>All subjects completed the 6 mo study</li> <li>Seizures decreased from median of 5/d at baseline to 2/d with KD, <math>P &lt; 0.001</math></li> <li>No significant differences in terms of height, weight, BMI z scores, and REE pre- and post-KD</li> <li>Respiratory quotient decreased <math>0.80 \pm 0.06</math> to <math>0.72 \pm 0.05</math>, <math>P &lt; 0.001</math></li> <li>Fat oxidation increased <math>50.9 \pm 25.2</math> to <math>97.5 \pm 25.7</math> mg/min, <math>P &lt; 0.001</math></li> <li>Carbohydrate oxidation decreased <math>72.5 \pm 54.1</math> to <math>21.5 \pm 48.2</math> mg/min, <math>P &lt; 0.001</math></li> <li>Increase in fat oxidation main independent predictor in seizure reduction (<math>\beta = -0.97</math>, <math>t = -6.3</math>, <math>P &lt; 0.05</math>)</li> </ul> | <ul style="list-style-type: none"> <li>6-mo period may not be adequate to assess impact of KD on height and weight</li> <li>Only Italian children used in this study</li> </ul>                                                                                             |
| 18. Taub et al. (7)<br>Children's Hospital of Philadelphia, PA                                                   | Retrospective cohort study, quantitative using caregiver-reported seizure diary as unchanged, improved, or worse compared with baseline | Risk of seizure recurrence in children who achieved $\geq 1$ mo of seizure freedom on KD | <ul style="list-style-type: none"> <li><math>n = 276</math>, records from 1991–2009</li> <li>Age at enrollment: (5/3.2)<sup>a</sup>y</li> <li><math>n = 65</math> achieved seizure freedom for <math>\leq 1</math> mo within 2 y of initiating the KD</li> <li>Daily seizures (<math>n = 45</math>, 69%), seizures <math>&gt; 1</math> time/wk at baseline (<math>n = 55</math>, 85%), unsuccessful treatment on <math>\geq 4</math> AEDs (<math>n = 50</math>, 77%)</li> </ul> | <ul style="list-style-type: none"> <li>No statistically significant results</li> <li>Seizures recurred in 53 (82%) patients in follow-up</li> <li>All but 6 patients had seizure frequency decreased from baseline</li> <li>19 patients (29%) had complete seizure remission lasting <math>\geq 1</math> y while consuming the KD; 9 of these 19 patients remained seizure-free for a median of 2.5 y after KD completion</li> <li>Provide counseling to families of children who become seizure-free, as breakthrough seizures are likely to occur but does not mean decline to baseline</li> </ul>                                                                                                                                                                                                                                                              | <ul style="list-style-type: none"> <li>1 of the patients with myoclonic astatic epilepsy was seizure-free for 2 y post-KD but had breakthrough seizures</li> <li>Retrospective study</li> <li>Missing data</li> <li>Could not verify details of seizure frequenc</li> </ul> |

<sup>1</sup> Values are <sup>a</sup>Mean/Standard Deviation; <sup>b</sup>Range; <sup>c</sup>Median/Range; <sup>d</sup>Mean. AED, antiepileptic drug; AIX, augmentation index; BMC, bone mineral content; ECG, electrocardiography; EEG, electroencephalogram; EER, energy efficiency ratio; GTC, generalized tonic-clonic; IE, intractable epilepsy; KD, ketogenic diet; MCT, medium-chain triglyceride; QoL, quality of life; RCT, randomized control trial; REE, resting energy expenditure; REM, rapid-eye movement; 1,25(OH)D, 1,25-hydroxyvitamin D; 25(OH)D, 25-hydroxyvitamin D
